# Supplementary material
Source: HighWire-hosted journal article supplement (https://jnm.snmjournals.org/highwire/filestream/95411/field_highwire_adjunct_files/0/221416_Supplemental_Data.pdf)
Supplement: 221416_Supplemental_Data.pdf [file 221416_Supplemental_Data.pdf]

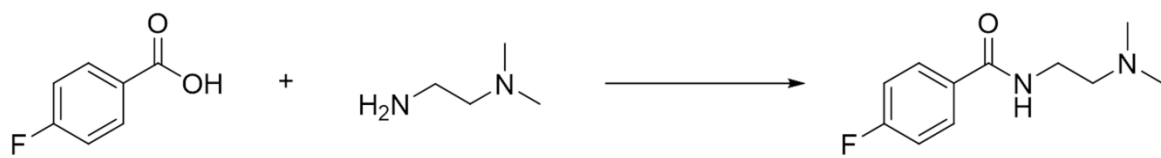

**Supplemental Figure 1.** Synthesis scheme for  $^{19}\text{F}$ -DMFB.

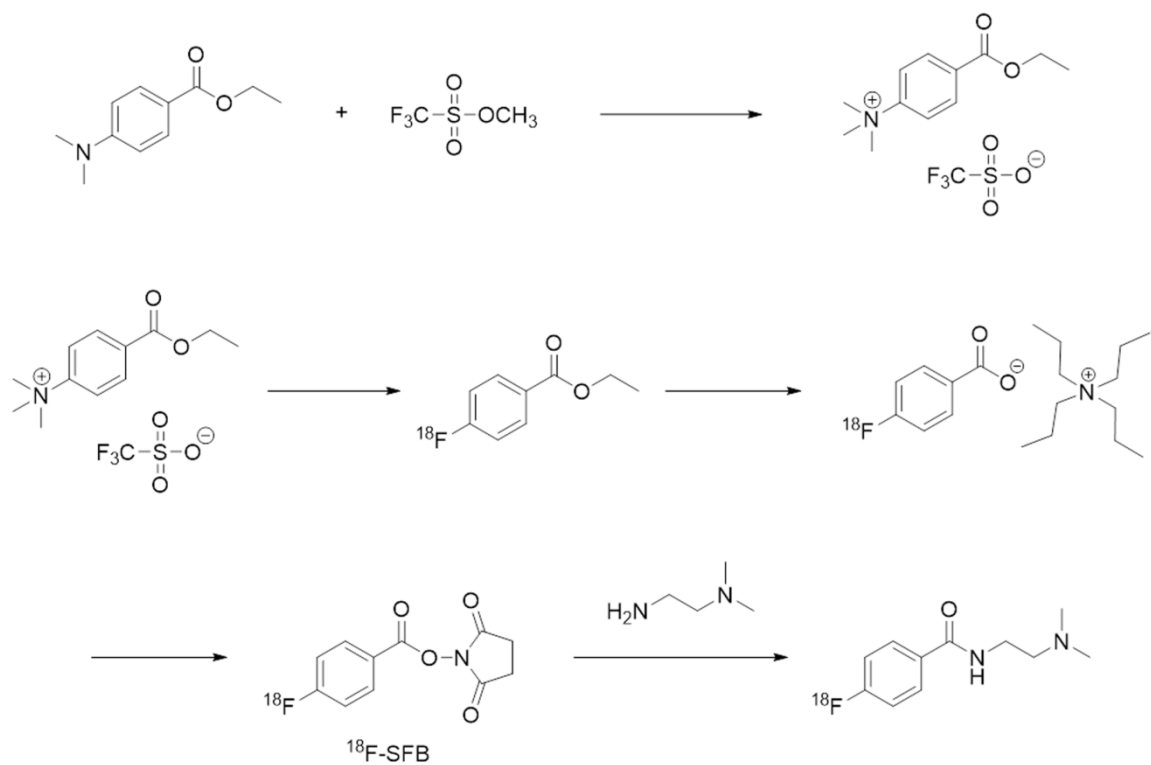

**Supplemental Figure 2A.** Synthesis scheme for  $^{18}\text{F}$ -DMFB.

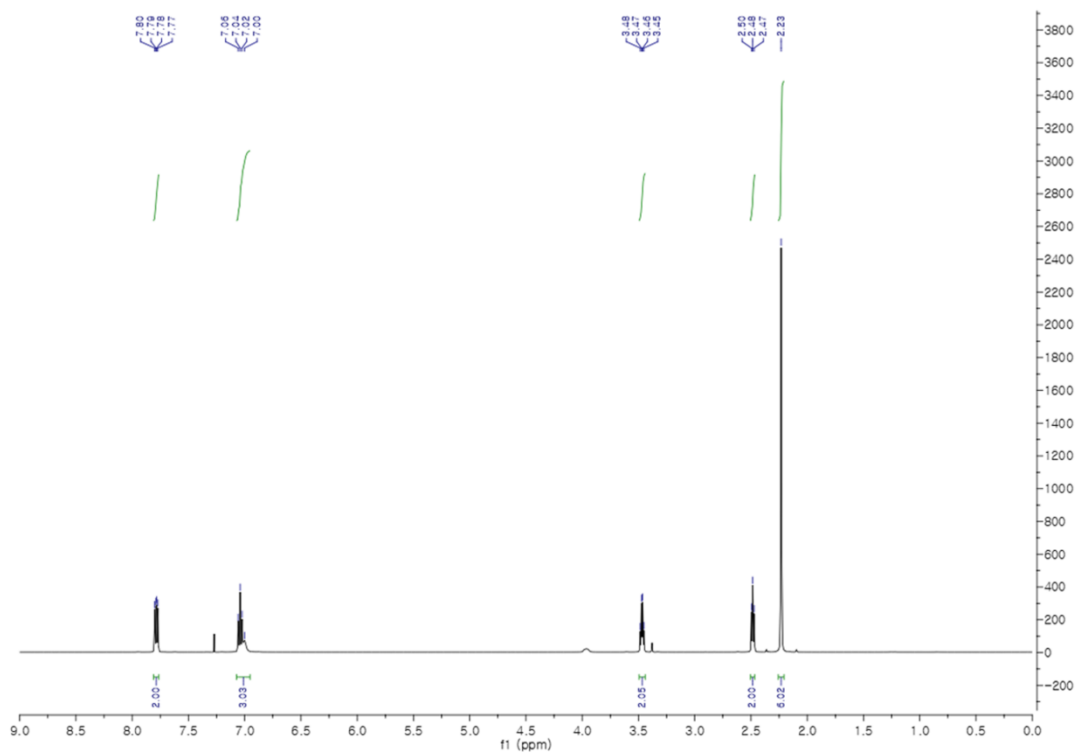

Supplemental Figure 2B. <sup>1</sup>H NMR spectrum of <sup>19</sup>F-DMFB.

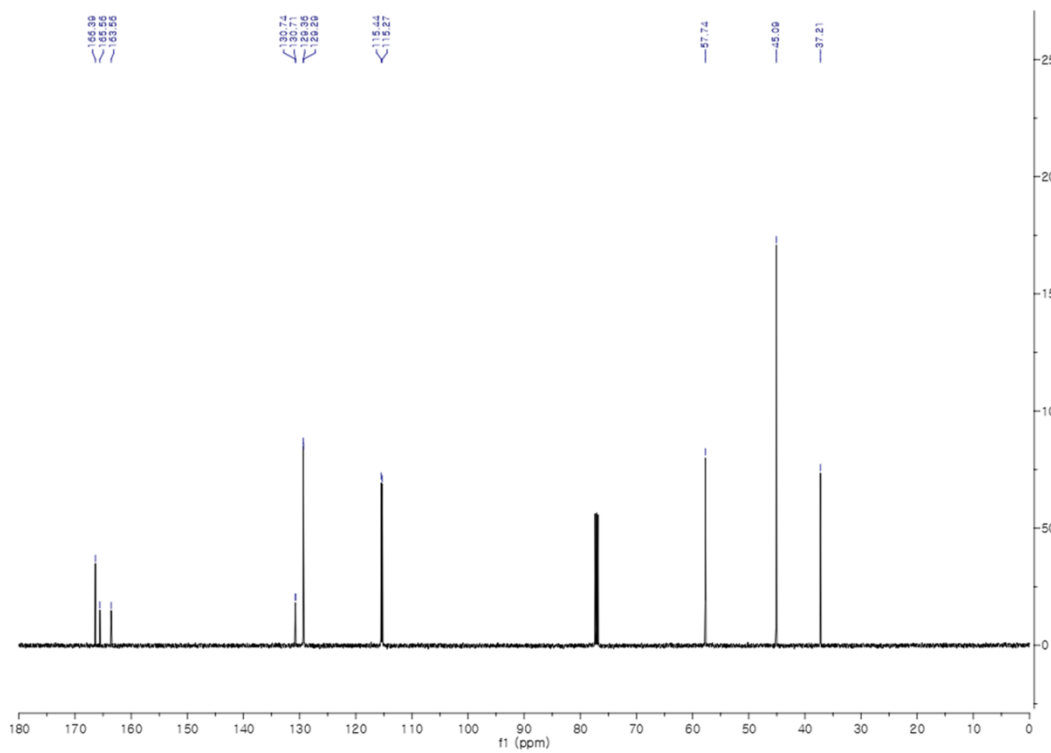

**Supplemental Figure 2C.**  $^{13}\text{C}$  NMR spectrum of  $^{19}\text{F}$ -DMFB.

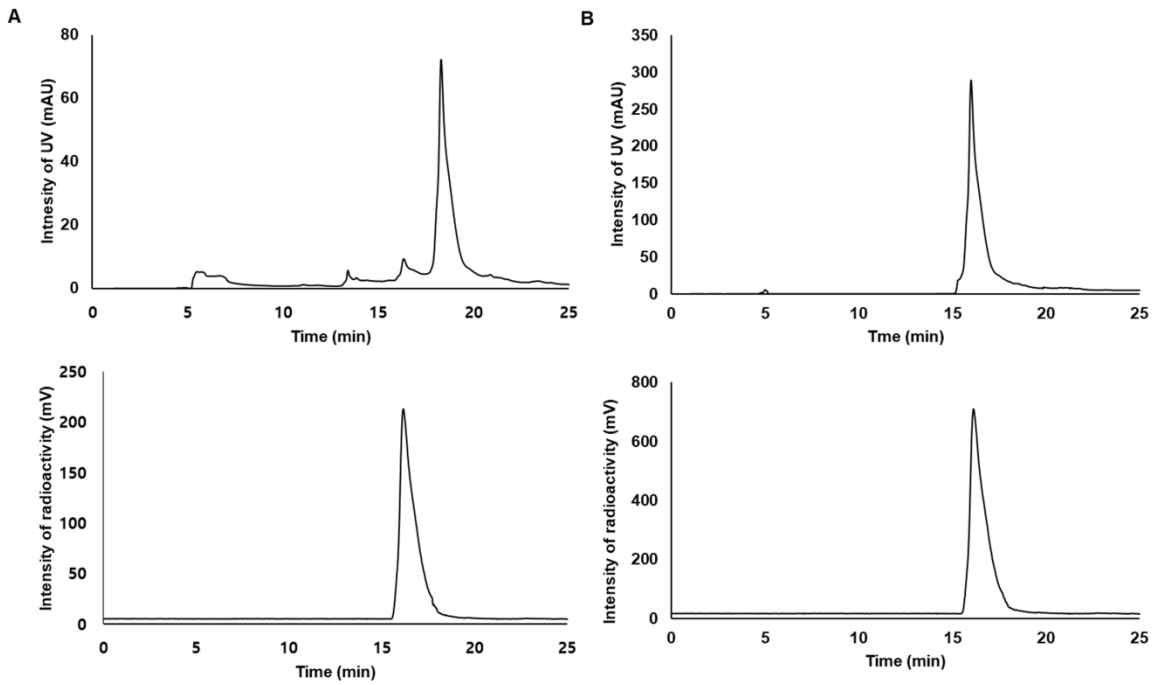

**Supplemental Figure 3.** (A) Purification of  $^{18}\text{F}$ -DMFB using semi-preparative HPLC. (B) HPLC chromatogram of  $^{18}\text{F}$ -DMFB, with its non-radioactive compound.

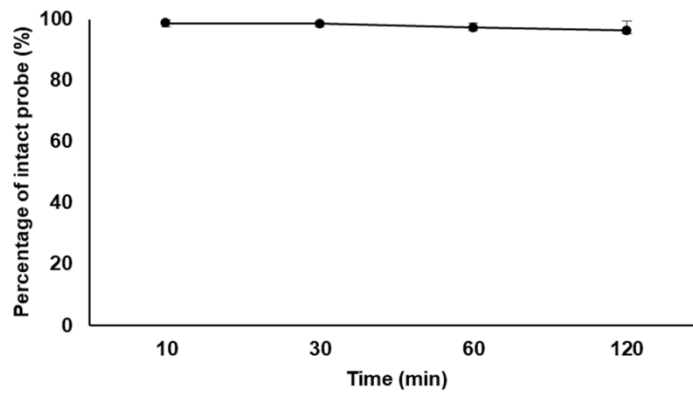

**Supplemental Figure 4.**  $^{18}\text{F}$ -DMFB stability in human serum after incubation at 37 °C for 10, 30, 60 and 120 min.

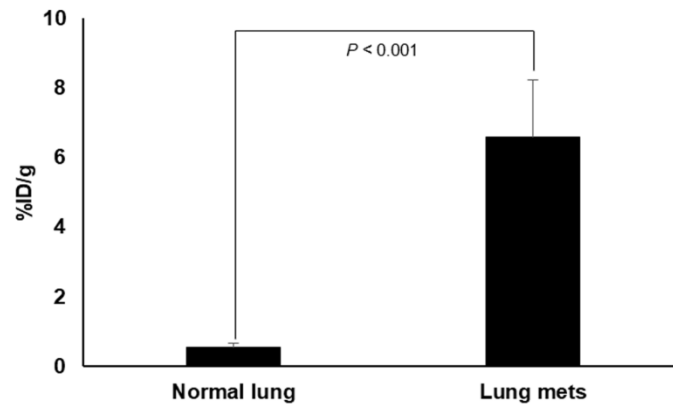

**Supplemental Figure 5.** Uptake value in normal lung and lung metastasis at 60 min after  $^{18}\text{F}$ -DMFB injection.

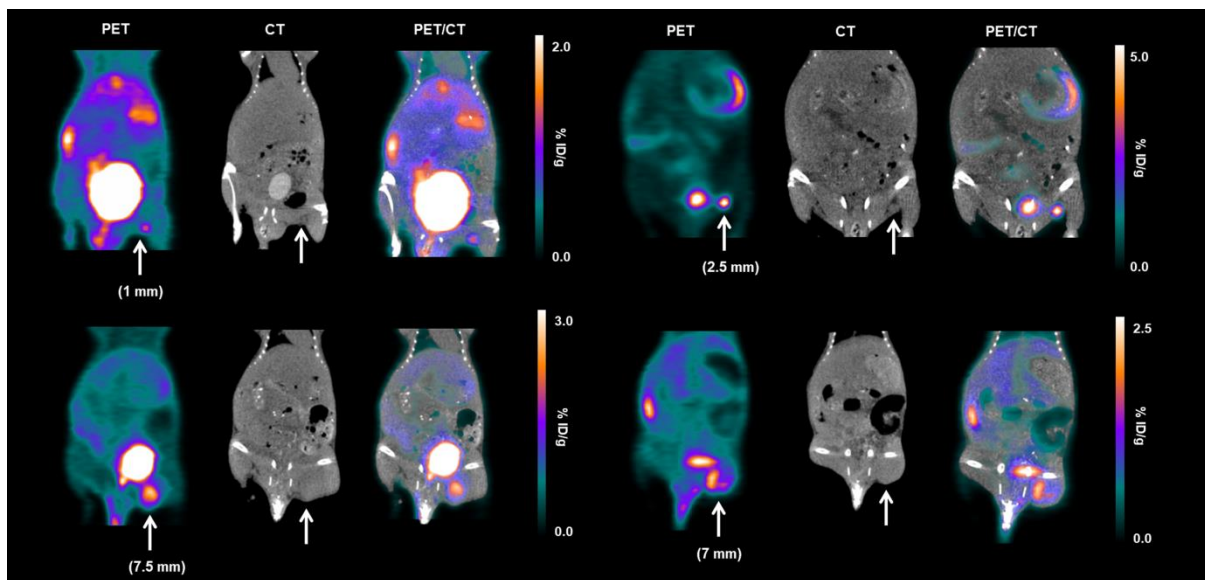

**Supplemental Figure 6.** MicroPET, CT and PET/CT fusion images of a B16F10 LN metastasis model at 60 min post-injection of  $^{18}\text{F}$ -DMFB (white arrow: LN metastasis region).

**Supplemental Table 1.** Tumor-to-organ ratios of  $^{18}\text{F}$ -DMFB in a B16F10 tumor-bearing Foxn1nu mouse model at 10, 30, 60 and 120 min after *i.v.* injection (n = 3 / each time point)

|                           | <b>10 min</b> | <b>30 min</b> | <b>60 min</b> | <b>120 min</b> |
|---------------------------|---------------|---------------|---------------|----------------|
| <b>Tumor-to-lung</b>      | 0.85 ± 0.41   | 2.37 ± 0.63   | 7.13 ± 2.44   | 31.81 ± 5.87   |
| <b>Tumor-to-liver</b>     | 0.83 ± 0.24   | 1.90 ± 0.66   | 5.54 ± 1.27   | 23.73 ± 2.24   |
| <b>Tumor-to-intestine</b> | 0.75 ± 0.22   | 1.39 ± 0.47   | 4.90 ± 0.22   | 20.76 ± 3.67   |
| <b>Tumor-to-bone</b>      | 1.82 ± 0.45   | 4.47 ± 0.93   | 13.73 ± 5.87  |                |
| <b>Tumor-to-brain</b>     | 1.40 ± 0.55   | 3.83 ± 1.62   | 12.20 ± 5.00  | 43.40 ± 13.43  |
| <b>Tumor-to-skin</b>      | 1.28 ± 0.60   | 2.79 ± 0.91   | 6.54 ± 1.02   | 28.99 ± 2.05   |
